# Supplementary material for: Novel piezoelectric properties of electrospun polyamide-imide nanofiber membranes
Source: Royal Society of Chemistry journal article supplement (doi:10.1039/d3ta05734h), 2023-01-01
Supplement: d3ta05734h1.pdf [file d3ta05734h1.pdf]

## Electronic Supplementary Information

### Novel Piezoelectric Properties of Electrospun Polyamide-imide Nanofiber Membranes

Ruixi Bai<sup>a</sup>, Hao Shao<sup>a</sup>, Haibo Chang<sup>b</sup>, Hongxia Wang<sup>c,d\*</sup>, Xiang Ding<sup>a</sup>, Weihua Cao<sup>e</sup>,  
Yuying Cao<sup>e</sup>, Tong Lin<sup>c,d\*</sup>

<sup>a</sup> Institute for Frontier Materials, Deakin University, Geelong, VIC 3216, Australia

<sup>b</sup> College of Chemistry and Chemical Engineering, Henan University, Kaifeng 475004, China

<sup>c</sup> School of Textile Science and Engineering, Tiangong University, Tianjin 300387, China

<sup>d</sup> Institute for Nanofiber Intelligent Manufacture and Applications, Tiangong University,  
Tianjin 300387, China

<sup>e</sup> School of Mechanical Engineering, Yanshan University, Qinhuangdao 066044, China

Corresponding author's email: hongxiawang@tiangong.edu.cn; tong.lin@tiangong.edu.cn

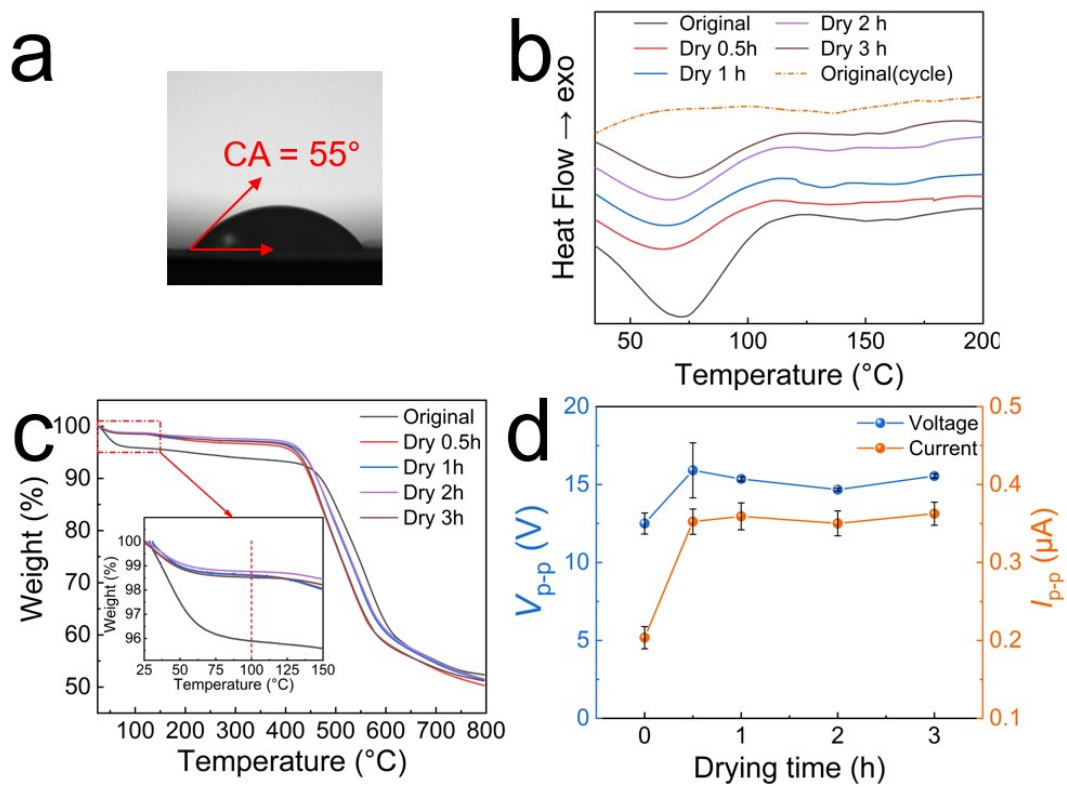

Figure S1. (a) Water contact angle of PAI nanofibers. (b) DSC curves and (c) TGA curves of PAI nanofibers after drying at different times. (d) Effect of drying time on the output voltage and current of PAI nanofibers.

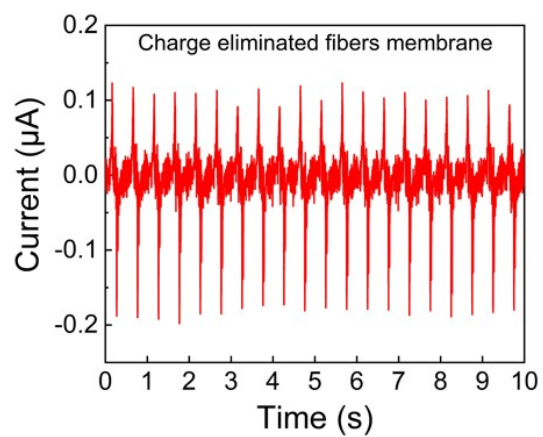

Figure S2. Current outputs of piezoelectric device made of the charge-eliminated PAI nanofibers.

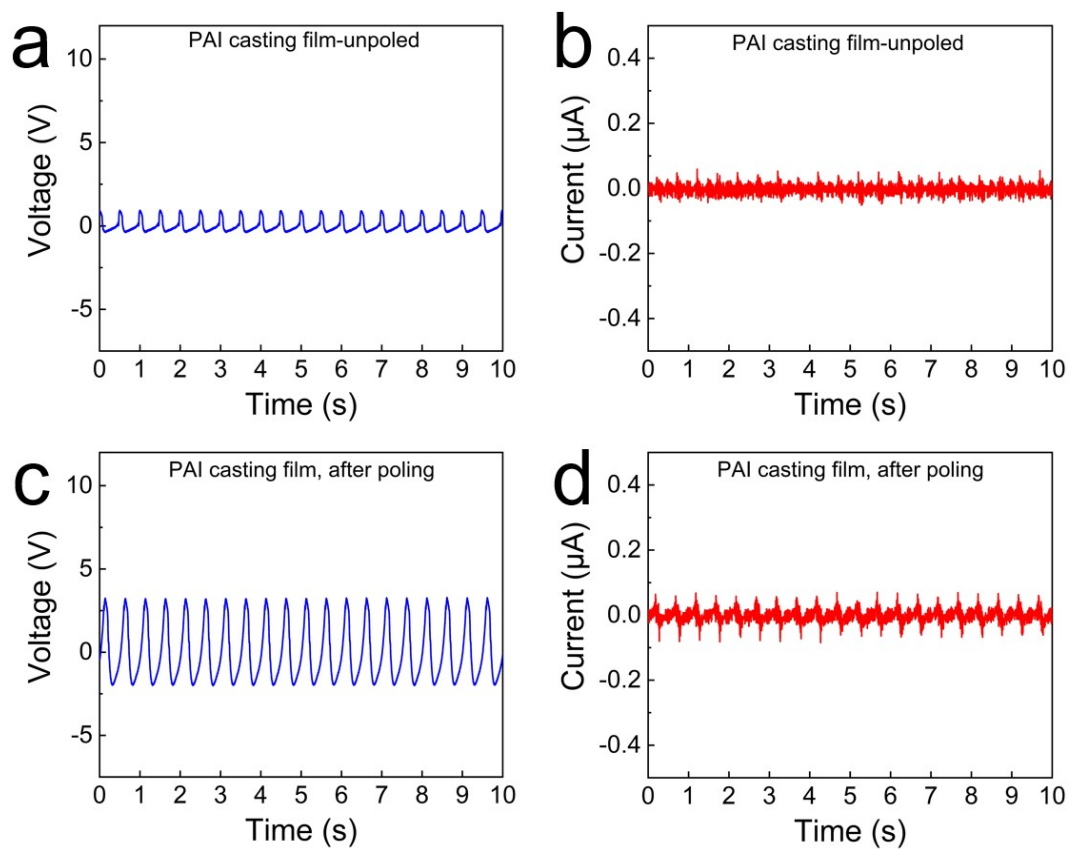

Figure S3. Electrical outputs of PAI casting film (a) (b) before and (c) (d) after electric poling treatment. (Compressive impact: 8 N, 2 Hz; working area: 4 cm<sup>2</sup>)

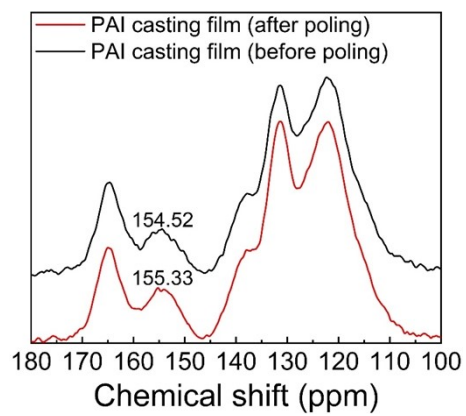

Figure S4. Solid-state  $^{13}\text{C}$  NMR spectra of PAI casting film before and after poling.

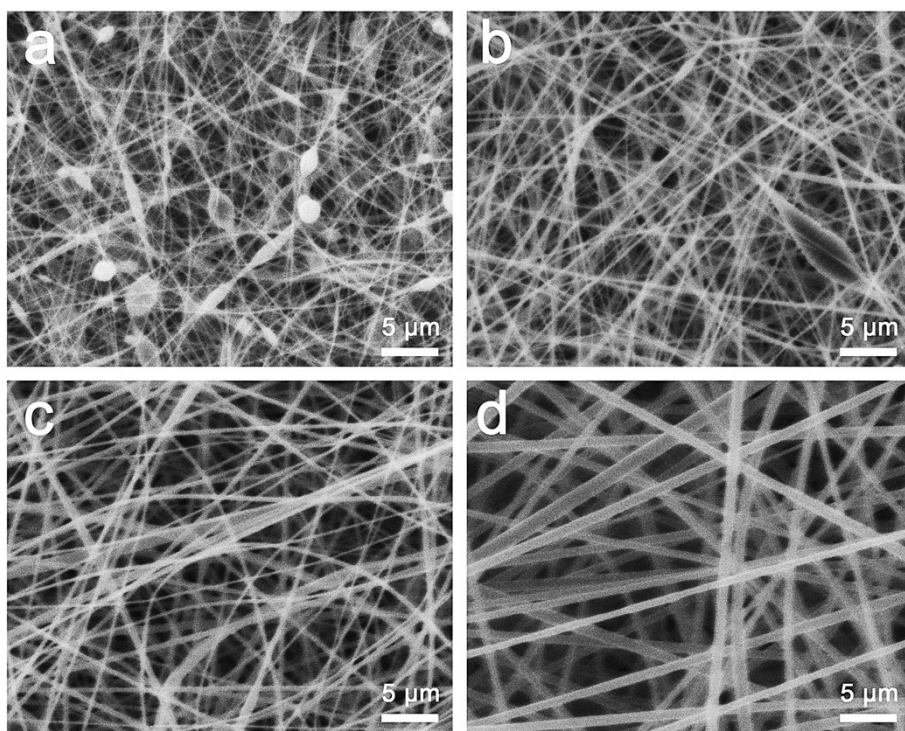

Figure S5. SEM images of PAI nanofibers electrospun from (a) 25 wt%, (b) 28 wt%, (c) 32 wt% and (d) 35 wt% PAI solutions.
